# Supplementary material for: Rapid On-Site Identification for Three Arcidae Species (Anadara kagoshimensis, Tegillarca granosa, and Anadara broughtonii) Using Ultrafast PCR Combined with Direct DNA Extraction
Source: MDPI journal article supplement (doi:10.3390/foods11162449), 2022-08-14
Supplement: s1 [file s1]

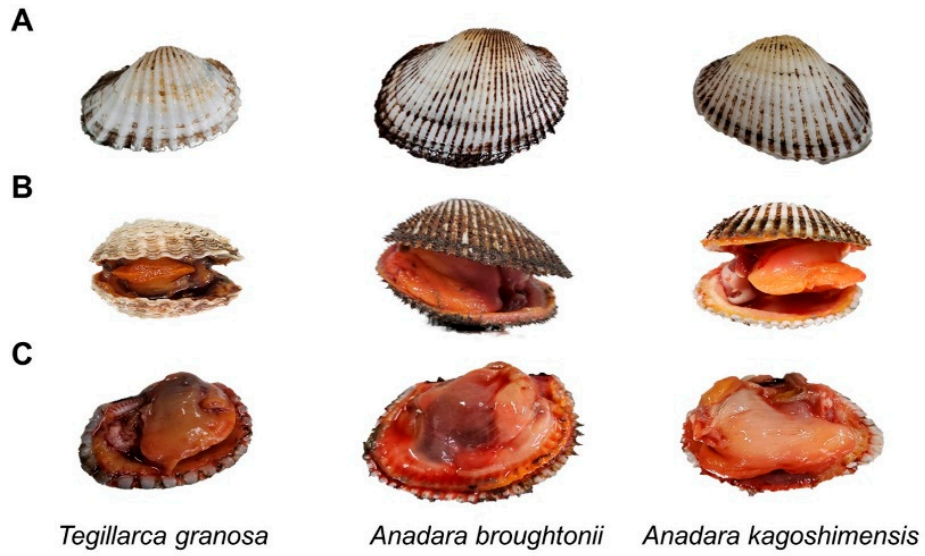

**Figure S1.** Morphological characteristics of granular ark (*Tegillarca granosa*), broughton's ribbed ark (*Anadara broughtonii*), and half-crenate ark (*Anadara kagoshimensis*). (A) shells, (B) shells with meat, and (C) ark shell meats.

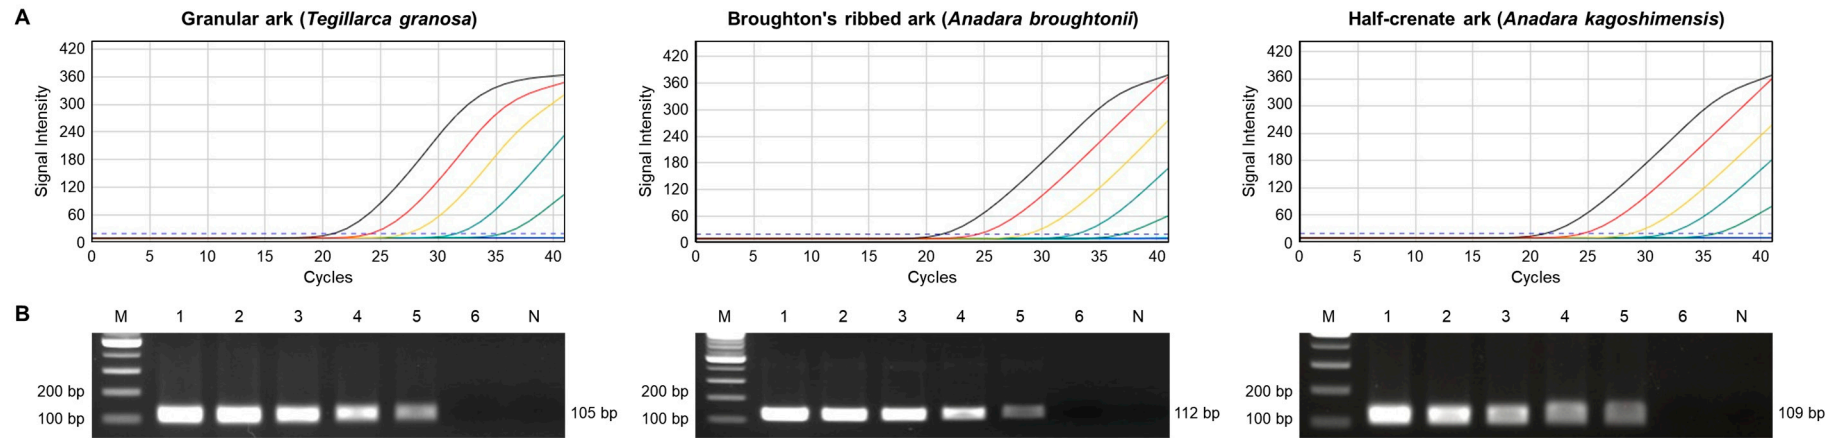

**Figure S2.** Sensitivity analysis of ultrafast PCR assay using serially diluted DNA (10 ng to 0.0001 ng). (A) Fluorescence of the amplified ark shell DNA was detected in real-time. (B) Electrophoresis of ultrafast PCR product: lane M, 100 bp DNA ladder; lane 1, 10 ng of target DNA; lane 2, 1 ng of target DNA; lane 3, 0.1 ng of target DNA; lane 4, 0.01 ng of target DNA; lane 5, 0.001 ng of target DNA; lane 6, 0.0001 ng of target DNA; lane N, non-template.
